# Supplementary material
Source: PubMed Central journal article supplement (PMC522005)
Supplement: pnas_101_41_14919__2.pdf [file pnas_101_41_14919__2.pdf]

**Table 1. PCR primers used in this study**

| PCR primer | Designed from | Annealing site  | Sequences (5'→3')      |
|------------|---------------|-----------------|------------------------|
| 8F         | Region 8      | 84672-84653     | AGGGGAGTCATTCTGTCATC   |
| 8M         |               | 84303-84322     | CACTGAAGGCCAAAGGAAGA   |
| 8R         |               | 84023-84042     | AAGTGATCCAACCCACGAGG   |
| 9F         | Region 9      | 170821-170840   | TTGCGGACCTATACATCCTC   |
| 9M         |               | 171030-171011   | TTTCTGCATCGTTGTAACAG   |
| 9R         |               | 171193-171174   | CCAAAGACTCTGACAACACTAG |
| 10F        | Region 10     | 1452462-1452481 | AAGCGGTTAGCAGAAGTGAG   |
| 10M        |               | 1452751-1452732 | ACCTCATTCTCAAATAGGTG   |
| 10R        |               | 1453111-1453092 | TTGAGCCTTTGTCCATCCGA   |
| 11F        | Region 11     | 4932398-4932417 | ACTCGCCTGTGGTGGGACAC   |
| 11M        |               | 4932697-4932678 | ACGATGCGAAAAGATTGCA    |
| 11R        |               | 4932997-4932978 | GCTGGATGCCGTCATTACTC   |
| 12F        | Region 12     | 4934778-4934797 | CAGCACAATTCGTCAGGAAT   |
| 12M        |               | 4935027-4935008 | CCCCCTGCATCCAGTGCGAA   |
| 12R        |               | 4935317-4935298 | TAACGCACGAAAGCCTACAT   |
| 13F        | Region 13     | 5209071-5209090 | GTTACCCGCTGATGTAACGA   |
| 13M        |               | 5209240-5209221 | GTAGAAATATTTGCACAGAT   |
| 13R        |               | 5209453-5209434 | AATAGATCATACTCAGCAAG   |
| 14F        | Region 14     | 5211311-5211330 | AGTTTGTTCGTGCTGTAGA    |
| 14M        |               | 5211520-5211501 | GCAAGGAGGATAGATAAATG   |
| 14R        |               | 5211657-5211638 | CCGAAAGGCTGTTTGATGC    |
| 15F        | Region 15     | 454833-454852   | GTTGAACATATGTCGTGGAAG  |
| 15M        |               | 455132-455113   | GGGCATGCTTCCTTATCCTG   |
| 15R        |               | 456922-456903   | GTGTTACACGTACGGCAAAA   |
| 16F        | Region 16     | 655301-655320   | AGTTTGAGAATAGTCAGGGA   |
| 16M        |               | 655510-655491   | TAGGATCAAGAGGGTAAACA   |
| 16R        |               | 655766-655747   | TTCTCATAAGTCTCTAAAGA   |
| 17-F1      | Region 17     | 1134241-1134260 | TTGTGTTGCCTGTACATTAT   |
| 17-F2      |               | 1140031-140050  | ACGGGCACTATACAAACCAG   |
| 17-F3      |               | 1145241-1145260 | ACTTCTATCGGAGCATCTTC   |
| 17-F4      |               | 1147751-1147770 | GAGAATACATCCTTCAACCG   |
| 17-R1      |               | 1148710-1148691 | GCTGGGTAGCCTGTACCTCT   |
| 17-R2      |               | 1145860-1145841 | TACAACACGGTTTGTCTGTC   |

| PCR primer | Designed from | Annealing site  | Sequences (5'→3')     |
|------------|---------------|-----------------|-----------------------|
| 17-R3      |               | 1140720-1140701 | TTCATGCTCAAGCAGATCT   |
| 17-R4      |               | 1135270-1135251 | CAGAATTCGGGATGGGATAC  |
| 18F        | Region 18     | 2226571-2226590 | ATCCCTTTGGAATGGATATA  |
| 18M        |               | 2226780-2226761 | AGTTGCCAATCTTATTTTCGC |
| 18R        |               | 2227053-2227034 | GTTATATTCTGCGCAAAGC   |
| 19F        | Region 19     | 2720631-2720650 | CCCGCCTTTCATCGAACTTC  |
| 19M        |               | 2720900-2720881 | CACTGATTGTCAAACGCCA   |
| 19R        |               | 2722330-2722311 | GTTTTGCAAGCCGGCTGTTA  |
| 20F        | Region 20     | 3515001-3515020 | CCGGCTGCATCCAGACCTTC  |
| 20M        |               | 3515340-3515321 | CACCACATGACAAGAGCAAC  |
| 20R        |               | 3515890-3515871 | CAAATGCTTCTGATCGCCA   |
| 21F        | Region 21     | 3932301-3932320 | AAGTCTTCATAAGCTTTCTG  |
| 21M        |               | 3932600-3932581 | AATCTAAACAGCCTTCTATT  |
| 21R        |               | 3933000-3932981 | CAATCTTCCGGAAGGCATT   |
| 22F        | Region 22     | 4312241-4312260 | TGCATAGTTCTGTCTGGGAT  |
| 22M        |               | 4312590-4312571 | TGACTCTAAAAGTTCCTTTC  |
| 22R        |               | 4312888-4312869 | GCTACCAAAGATATACCGTA  |
| 23F        | Region 23     | 5090741-5090760 | AATCAGCCCATTGGCAAAT   |
| 23M        |               | 5090920-5090901 | AGAGGCGAATCCGTATTCCA  |
| 23R        |               | 5091371-5091352 | TTACTTTGTCATAGGCATTT  |
| 24F        | Region 24     | 5113098-5113117 | ACAGAACCGGATAGAAAACC  |
| 24M        |               | 5113507-5113488 | TTCTCTGAGGCGGCACGTT   |
| 24R        |               | 5113967-5113948 | TTCTCGAAACCGGATTAGGT  |
| 25F        | Region 25     | 4606751-4606770 | TGTGCTCCGAACAAGCACTC  |
| 25M        |               | 4607020-4607001 | TTGAAAGATGGGAAAGGGTT  |
| 25R        |               | 4607248-4607229 | TGAGGTAAACCGGATGAATA  |
| 26F        | Region 26     | 3407981-3408000 | ACCCAGGAGTTCGTCAAGAG  |
| 26M        |               | 3408230-3408211 | TTATTGTCATCATCGGATGT  |
| 26R        |               | 3408532-3408513 | CGGACAAACAGGAAGATACT  |
| 27F        | Region 27     | 4882601-4882620 | CCACTAAGAGCGCAGCTACG  |
| 27M        |               | 4882800-4882781 | CAAAACGCCATTTGCATCCT  |
| 27R        |               | 4883233-4883214 | GGAAGTGCACCCGGGTATTA  |
| 28F        | Region 28     | 3178132-3178151 | TATGTGGCACGCCACAGTTG  |
| 28M        |               | 3178581-3178562 | TTGTAAACTCCTGTTGAGT   |
| 28R        |               | 3178901-3178882 | GACAGAAAGGTGCCATTCAA  |

| PCR primer | Designed from | Annealing site  | Sequences (5'→3')              |
|------------|---------------|-----------------|--------------------------------|
| 29F        | Region 29     | 3883670-3883651 | CTGAGTTTGCAGAGCTTCTG           |
| 29M        |               | 3883411-3883430 | AGTTGAGATAATAGTCGCAT           |
| 29R        |               | 3883051-3883070 | AGCACTCTGTCTGCTAATGG           |
| J1         | Region 30     | 780501-780520   | TGACGGAGATATCTCCACTC           |
| J2         |               | 780950-780931   | ATGCTGTTATTGACTTGCCT           |
| K1         |               | 783041-783060   | TGGGAGATCGATATAGGGAT           |
| K2         |               | 783380-783361   | TTTCCGTTGTAATACTCGAT           |
| L1         |               | 787801-787820   | CTACCATTGGGAAAGGAATA           |
| L2         |               | 788320-788301   | GTCCCTGAAGCATCTGATCA           |
| A1         | Region 31     | 1981801-1981829 | TATCACGGATTTGTTGGGTAAGTGGACCG  |
| 1F         |               | 1983483-1983506 | GTGCCACTGCTATTTATGGTGCTC       |
| 1R         |               | 1986477-1986451 | GGATCACTATAAGACATAGATGTACCC    |
| 2F         |               | 1996859-1996888 | CGCCAAGCAACGCTTCTATTTCTGTCTGAG |
| 2R         |               | 1992031-1992004 | ACCGAAATAGTTACCGGATGTGACTACC   |
| 3F         |               | 2003649-2003676 | CGAAGCATCACGATGGATTTGCCTTGTG   |
| 3R         |               | 2000652-2000625 | AAGATTACTTCATCCACTTGATTCCCTG   |
| 4F         |               | 2012948-2012975 | GTCACCTTTTTTCATAGAAACGTGAACTG  |
| 4R         |               | 2007073-2007046 | TATAGCATCGGACTCCATATAGCGGAGC   |
| A2         |               | 2017881-2017856 | GTCACCTTAAACCAATCAGTGACAGC     |
| PS-7-F     | PS-7          | 3200380-3200404 | ATGATAATCTGCAAGTTAAGTGACC      |
| PS-7-R     | PS-7          | 3326696-3326272 | CTAATGCGTTTCTGAAGTGTACGGA      |
| CTn3-F     | CTnYCH46-3    | 3325914-3325938 | ATGTCGCTTCAACAGGTGGCATGGC      |
| CTn3-R     | CTnYCH46-3    | 3201264-3201240 | ACCACTTGTCAACTCTATGATACGC      |
