# Supplementary material
Source: PubMed Central journal article supplement (PMC522005)
Supplement: pnas_101_41_14919__3.pdf [file pnas_101_41_14919__3.pdf]

**Table 2. Primer pairs and their predicted product sizes**

| <b>Primer pair</b> | <b>Detection</b>                        | <b>Predicted size,<br/>bp</b> |
|--------------------|-----------------------------------------|-------------------------------|
| 8F-8M              | Region 8 shown in Table 6 (protocol F)  | 370                           |
| 8M-8R              | Region 8 shown in Table 6 (protocol R)  | (348)                         |
| 9F-9M              | Region 9 shown in Table 6 (protocol F)  | 210                           |
| 9M-9R              | Region 9 shown in Table 6 (protocol R)  | (200)                         |
| 10F-10M            | Region 10 shown in Table 6 (protocol F) | 290                           |
| 10M-10R            | Region 10 shown in Table 6 (protocol R) | (375)                         |
| 11F-11M            | Region 11 shown in Table 6 (protocol F) | 300                           |
| 11M-11R            | Region 11 shown in Table 6 (protocol R) | (286)                         |
| 12F-12M            | Region 12 shown in Table 6 (protocol F) | 250                           |
| 12M-12R            | Region 12 shown in Table 6 (protocol R) | (253)                         |
| 13F-13M            | Region 13 shown in Table 6 (protocol F) | 170                           |
| 13M-13R            | Region 13 shown in Table 6 (protocol R) | (190)                         |
| 14F-14M            | Region 14 shown in Table 6 (protocol F) | 210                           |
| 14M-14R            | Region 14 shown in Table 6 (protocol R) | (190)                         |
| 15F-15M            | Region 15 shown in Table 6 (protocol F) | 300                           |
| 15M-15R            | Region 15 shown in Table 6 (protocol R) | (382)                         |
| 16F-16M            | Region 16 shown in Table 6 (protocol F) | 210                           |
| 16M-16R            | Region 16 shown in Table 6 (protocol R) | (210)                         |
| 18F-18M            | Region 18 shown in Table 6 (protocol F) | 210                           |
| 18M-18R            | Region 18 shown in Table 6 (protocol R) | (330)                         |
| 19F-19M            | Region 19 shown in Table 6 (protocol F) | 270                           |
| 19M-19R            | Region 19 shown in Table 6 (protocol R) | 228                           |
| 20F-20M            | Region 20 shown in Table 6 (protocol F) | 340                           |
| 20M-20R            | Region 20 shown in Table 6 (protocol R) | (434)                         |
| 21F-21M            | Region 21 shown in Table 6 (protocol F) | 300                           |
| 21M-21R            | Region 21 shown in Table 6 (protocol R) | (400)                         |
| 22F-22M            | Region 22 shown in Table 6 (protocol F) | 350                           |
| 22M-22R            | Region 22 shown in Table 6 (protocol R) | (350)                         |
| 23F-23M            | Region 23 shown in Table 6 (protocol F) | 180                           |
| 23M-23R            | Region 23 shown in Table 6 (protocol R) | (230)                         |
| 24F-24M            | Region 24 shown in Table 6 (protocol F) | 410                           |
| 24M-24R            | Region 24 shown in Table 6 (protocol R) | (514)                         |

| <b>Primer pair</b> | <b>Detection</b>                                                               | <b>Predicted size,<br/>bp</b> |
|--------------------|--------------------------------------------------------------------------------|-------------------------------|
| 25F-25M            | Region 25 shown in Table 6 (protocol F)                                        | 270                           |
| 25M-25R            | Region 25 shown in Table 6 (protocol R)                                        | (240)                         |
| 26F-26M            | Region 26 shown in Table 6 (protocol F)                                        | 250                           |
| 26M-26R            | Region 26 shown in Table 6 (protocol R)                                        | (200)                         |
| 27F-27M            | Region 27 shown in Table 6 (protocol F)                                        | 200                           |
| 27M-27R            | Region 27 shown in Table 6 (protocol R)                                        | (220)                         |
| 28F-28M            | Region 28 shown in Table 6 (protocol F)                                        | 450                           |
| 28M-28R            | Region 28 shown in Table 6 (protocol R)                                        | (378)                         |
| 29F-29M            | Region 29 shown in Table 6 (protocol F)                                        | 260                           |
| 29M-29R            | Region 29 shown in Table 6 (protocol R)                                        | (327)                         |
| J1-J2              | Region 30                                                                      | 450                           |
| K1-K2              | Region 30                                                                      | 340                           |
| L1-L2              | Region 30                                                                      | 520                           |
| J1-K1              | Region 30 (inversion of segment 1)                                             | (446)                         |
| J2-K2              | Region 30 (inversion of segment 1)                                             | (344)                         |
| J1-L1              | Region 30 (group inversion of segments 1 and 2)                                | (578)                         |
| J2-L2              | Region 30 (group inversion of segments 1 and 2)                                | (392)                         |
| K1-L2              | Region 30 (group inversion of segments 1 and 2 plus<br>inversion of segment 1) | (388)                         |
| K1-L1              | Region 30 (inversion of segment 2)                                             | (496)                         |
| K2-L2              | Region 30 (inversion of segment 2)                                             | (364)                         |
| J2-K1              | Region 30                                                                      | -                             |
| K2-L1              | Region 30                                                                      | -                             |
| J2-L1              | Region 30 (inversion of segments 1 plus inversion of segment 2)                | (500)                         |
| J1-K2              | Region 30 (deletion of segment 1)                                              | (448)                         |
| J1-L2              | Region 30 (deletion of segment 1 and 2)                                        | (496)                         |
| PS-7F-PS-7R        | PS-7 locus                                                                     | (317)                         |
| PS-7F-CTn3R        | PS-7 locus                                                                     | 885                           |
| CTn3F-PS-7R        | PS-7 locus                                                                     | 783                           |
| CTn3F-CTn3R        | PS-7 locus                                                                     | (475)                         |
| PS-7F-CTn3F        | PS-7 locus                                                                     | -                             |

Primer pairs used to detect the DNA inversion in regions 17 and 31, and their predicted product sizes are shown in Fig. 5 and Table 3, respectively. The nucleotide sequence of

each primer is shown in Table 1. The numbers in parentheses indicate the predicted size of a segment generated by DNA inversion.
