# Supplementary material
Source: PubMed Central journal article supplement (PMC522005)
Supplement: pnas_101_41_14919__7.pdf [file pnas_101_41_14919__7.pdf]

**Table 4. Major paralogous gene families in BF, BT, and PG**

| Top<br>20 | BF strain YCH46                              |              | BT strain VPI-5482                                                      |              | PG strain W83                                                |              |
|-----------|----------------------------------------------|--------------|-------------------------------------------------------------------------|--------------|--------------------------------------------------------------|--------------|
|           | Function                                     | No. of genes | Function                                                                | No. of genes | Function                                                     | No. of genes |
| 1         | Outer membrane protein, SusC homolog         | 54           | Outer membrane protein, SusC homolog                                    | 79           | ABC transporter, ATP-binding protein 1                       | 14           |
| 2         | RNA polymerase ECF-type sigma factor         | 38           | Outer membrane protein, SusD homolog                                    | 49           | DNA-binding protein, histone-like family                     | 9            |
| 3         | Antisigma factor                             | 25           | RNA polymerase ECF-type sigma factor                                    | 43           | Hypothetical protein                                         | 6            |
| 4         | ABC transporter, ATP-binding protein         | 25           | Antisigma factor                                                        | 25           | RNA polymerase ECF-type sigma factor                         | 4            |
| 5         | Outer membrane protein, SusD homolog         | 23           | Two-component system sensor histidine kinase/response regulator, hybrid | 24           | $\alpha$ -1,2-mannosidase                                    | 4            |
| 6         | Two-component system sensor histidine kinase | 11           | Site-specific recombinase (tyrosine type)                               | 23           | Oxidoreductase                                               | 4            |
| 7         | Glycosyltransferase (GT family 2)            | 11           | $\alpha$ -1,2-mannosidase                                               | 23           | Peptidyl-prolyl <i>cis-trans</i> isomerase, FKBP type        | 4            |
| 8         | Hexosaminidase precursor                     | 10           | ABC transporter ATP-binding protein                                     | 23           | Na <sup>+</sup> -transporting NADH:ubiquinone oxidoreductase | 4            |

| Top<br>20 | BF strain YCH46                                  |              | BT strain VPI-5482                           |              | PG strain W83                             |              |
|-----------|--------------------------------------------------|--------------|----------------------------------------------|--------------|-------------------------------------------|--------------|
|           | Function                                         | No. of genes | Function                                     | No. of genes | Function                                  | No. of genes |
| 9         | Putative transcriptional regulator, UpxY homolog | 10           | DNA-binding protein, histone-like family     | 15           | Hypothetical protein                      | 4            |
| 10        | Outer membrane protein (Omp121 family)           | 9            | Outer membrane protein (Omp121 family)       | 15           | Hypothetical protein                      | 4            |
| 11        | $\alpha$ -1,2-mannosidase                        | 9            | Glycosyltransferase (GT family 2)            | 15           | Hypothetical protein                      | 4            |
| 12        | Arylsulfatase                                    | 9            | Two-component system sensor histidine kinase | 13           | Two-component system response regulator   | 3            |
| 13        | Site-specific recombinase (tyrosine type)        | 9            | Endo-1,4- $\beta$ -xylanase                  | 12           | Site-specific recombinase (tyrosine type) | 3            |
| 14        | Hypothetical protein                             | 9            | $\beta$ -hexosaminidase precursor            | 12           | ABC transporter, ATP-binding protein, 2   | 3            |
| 15        | DNA-binding protein, histone-like family         | 9            | Arylsulfatase                                | 12           | ABC transporter, ATP-binding protein, 3   | 3            |
| 16        | Conserved hypothetical protein                   | 9            | Oxidoreductase                               | 11           | Transmembrane cation efflux protein       | 3            |
| 17        | AraC-type transcription regulator 1              | 8            | AraC-type transcription regulator            | 11           | 2-amino-3-ketobutyrate CoA ligase         | 3            |
| 18        | AraC-type transcription regulator 2              | 8            | <i>N</i> -acetylmuramoyl-L-alanine amidase   | 10           | Nitroreductase family protein             | 3            |
| 19        | Two-component system response                    | 8            | Hypothetical protein                         | 10           | Carboxyl-terminal protease                | 3            |

| Top<br>20 | BF strain YCH46                                 |                    | BT strain VPI-5482             |                    | PG strain W83           |                 |
|-----------|-------------------------------------------------|--------------------|--------------------------------|--------------------|-------------------------|-----------------|
|           | Function                                        | No.<br>of<br>genes | Function                       | No.<br>of<br>genes | Function                | No. of<br>genes |
|           | regulator                                       |                    |                                |                    |                         |                 |
| 20        | Conserved hypothetical protein,<br>UpxZ homolog | 8                  | Conserved hypothetical protein | 10                 | Glycerate dehydrogenase | 3               |

The largest paralogous gene families (top 20) found in BF strain YCH46, BT strain VPI-5482, and PG strain W83 genomes are listed. Genes located on mobile genetic elements were excluded from this analysis. Paralogues were defined as the genes whose amino acid sequences showed >30% identity over 60% of the length. The numbers of gene included in each paralogous gene family are thus not necessarily identical to those based on the annotation. For example, there are 34 tyrosine type site-specific recombinases in the BF strain YCH46 genome (in addition, 10 are on mobile genetic elements). But these have been divided into several families by the criterion used in this analysis.
