# Supplementary material
Source: PubMed Central journal article supplement (PMC522005)
Supplement: pnas_101_41_14919__8.pdf [file pnas_101_41_14919__8.pdf]

**Table 5. Capsular PS loci on the genomes of BF and BT**

| Designation               | ORFs          | Length, kb | No. of ORFs contained | IRs flanking the promoter *      |
|---------------------------|---------------|------------|-----------------------|----------------------------------|
| <b>BF strain YCH46</b>    |               |            |                       |                                  |
| PS-1                      | BF0803-BF0827 | 22         | 25                    | <u>AAACGTTTCGTC</u> TATTTGAACACT |
| PS-2                      | BF1092-BF1112 | 32         | 32                    | –                                |
| PS-3                      | BF1428-BF1445 | 17         | 18                    | TGTTTCAAAAAACGTTTCGT             |
| PS-4                      | BF1528-BF1551 | 24         | 24                    | AGTGTTC AATAGACGTTTCGTTTAA       |
| PS-5                      | BF1828-BF1848 | 23         | 22                    | TGTTTCAAAAAACGTTTCGT             |
| PS-6                      | BF2566-BF2585 | 21         | 21                    | TGTTTCAAAA <u>ARACGTTTCGT</u>    |
| PS-7                      | BF2775-BF2935 | 25 †       | 27 †                  | –                                |
| PS-8                      | BF3644-BF3667 | 21         | 24                    | TGTTTCAAAAAACGTTTCGT             |
| PS-9                      | BF3911-BF3925 | 16         | 15                    | AGTGTTC AAT <u>ARACGATCGTCT</u>  |
| <b>BT strain VPI-5482</b> |               |            |                       |                                  |
| PS-1                      | BT0375-BT0402 | 28         | 28                    | <u>GTTACTTCTTAGGTAACGGAAGT</u>   |
| PS-2                      | BT0462-BT0482 | 22         | 21                    | –                                |
| PS-3                      | BT0595-BT0614 | 26         | 20                    | <u>GTTACTTCTTAGGTAACGGA</u>      |
| PS-4                      | BT1336-BT1358 | 23         | 23                    | –                                |
| PS-5                      | BT1642-BT1657 | 17         | 16                    | <u>CGTTACTTCTTAGGTAACG</u>       |
| PS-6                      | BT1707-BT1726 | 21         | 20                    | <u>CGTTACTTCTTAGGTAACG</u>       |
| PS-7                      | BT2862-BT2886 | 25         | 25                    | –                                |

\*IRs identified in each PS promoter region are shown. Noninvertible PS promoters are indicated by –. Consensus motif sequences (ARACGTWCGT) within each IR in BF are underlined, and those in BT are indicated by dashed line.

†The size and number of genes in the PS-7 locus, excluding CTnYCH46-3 (BF2788-BF2921) are shown.
