# Supplementary material
Source: PubMed Central journal article supplement (PMC522005)
Supplement: pnas_101_41_14919__9.pdf [file pnas_101_41_14919__9.pdf]

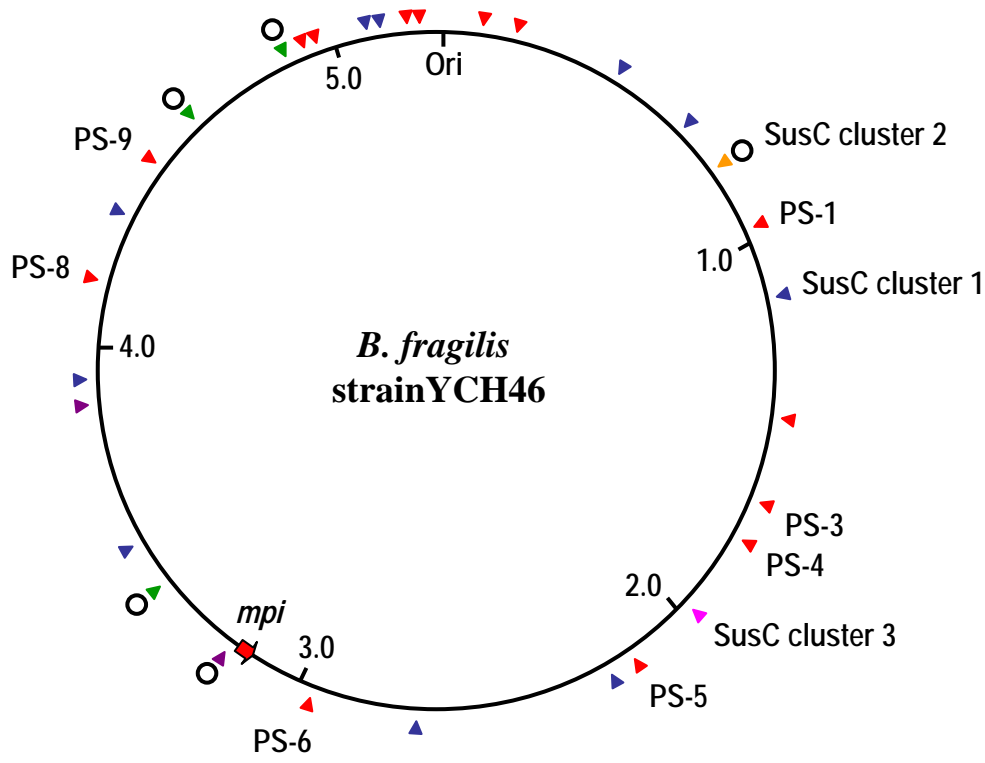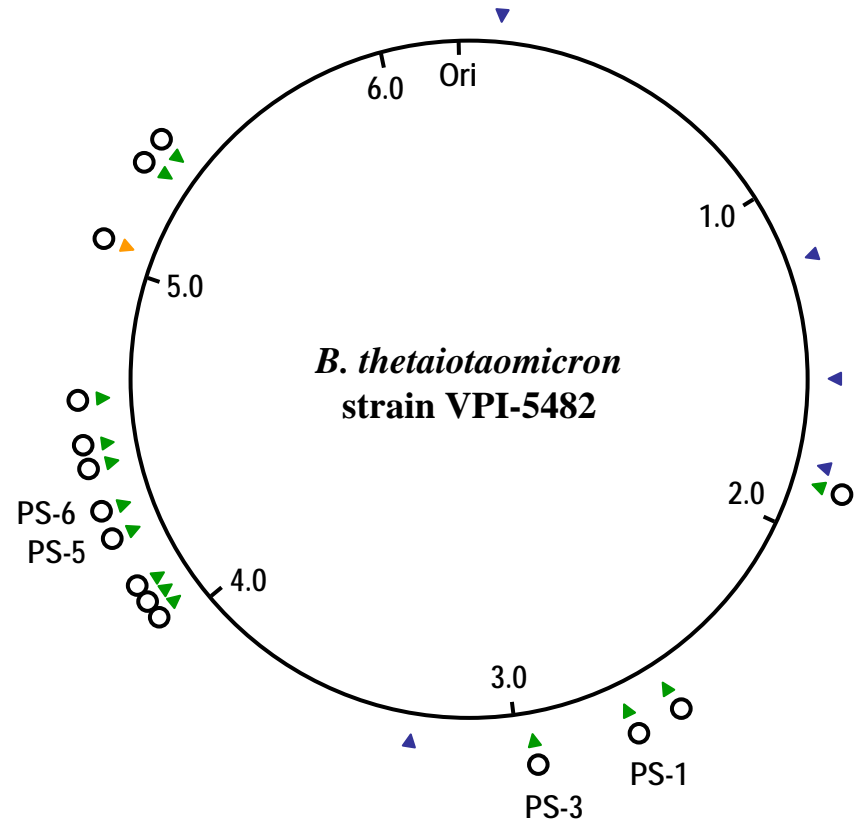

▶ Class I region (Mpi recognition sequence: ARACGTWCGT)

▶ Class II region (AGTTC{N<sub>5</sub>}GAACT)

▶ Class III region (GTTAC{N<sub>7</sub>}GTAAC)

▶ Class IV region (TACTTANTAGGTAANAGAA)

▶ Class V region (TCTGCAAAGNCTTTGCAGA)

▶ Class VI region (ACTAAGTTCTATCGG)

○ Tyrosine type site-specific recombinase
