# Supplementary material
Source: PubMed Central journal article supplement (PMC522005)
Supplement: pnas_101_41_14919__10.pdf [file pnas_101_41_14919__10.pdf]

**Table 6. Invertible regions identified on the genome of BF strain YCH46**

| Region                          | IR sequence *                          | Affected genes †            | Description ‡                                                                            | Inversion type § | Recombinase ¶ |
|---------------------------------|----------------------------------------|-----------------------------|------------------------------------------------------------------------------------------|------------------|---------------|
| <b>Class I IR (ARACGTWC GT)</b> |                                        |                             |                                                                                          |                  |               |
| 1                               | <u>AAACGTTTCG</u> ICTATTTGAAC          | BF0803-<br>BF0827           | UpxYZ-PS-1                                                                               | 1-a              | -             |
| 2                               | TGTTTCAAAA <u>ACGTTTCG</u> T           | BF1428-<br>BF1445           | UpxYZ-PS-3                                                                               | 1-a              | -             |
| 3                               | AGTGTTTCAAT <u>AGACGTTTCG</u><br>TTTAA | BF1528-<br>BF1551           | UpxYZ-PS-4                                                                               | 1-a              | -             |
| 4                               | TGTTTCAAAA <u>ACGTTTCG</u> T           | BF1828-<br>BF1848           | UpxYZ-PS-5                                                                               | 1-a              | -             |
| 5                               | TGTTTCAAAA <u>RACGTTTCG</u> T          | BF2585-<br>BF2566           | UpxYZ-PS-6                                                                               | 1-a              | -             |
| 6                               | TGTTTCAAAA <u>ACGTTTCG</u> T           | BF3667-<br>BF3644           | UpxYZ-PS-8                                                                               | 1-a              | -             |
| 7                               | AGTGTTTCAAT <u>ARACGATCGT</u><br>CT    | BF3925-<br>BF3925           | UpxYZ-PS-9                                                                               | 1-a              | -             |
| 8                               | TGTTTCAAAA <u>ARACGTTTCST</u>          | BF0074-<br>BF0076           | Putative electron transport protein /<br>polysaccharide<br>deacetylase/ IMP              | 1-b              | -             |
| 9                               | TGTTTCAAAA <u>ARACGTACGTC</u><br>T     | BF0077-<br>BF0078<br>BF0160 | OMLP (family 1) / OMP<br>OMLP (family 1)                                                 | 1-a              | -             |
| 10                              | ATGTGTTTTT <u>AAACGTACGTT</u><br>TA    | BF1219-<br>BF1220           | Fe <sup>3+</sup> ABC transporter, permease and ATP-<br>binding protein                   | 1-b              | -             |
|                                 |                                        | BF1221-<br>BF1224           | HP / capsular polysaccharide export protein /<br>HP / putative transcriptional regulator |                  |               |
| 11                              | TGTTTCAAAA <u>AGACGTTTCGTC</u><br>T    | BF4332                      | OMLP (family 1)                                                                          | 1-a              | -             |

|                                                |                                                       |                                        |                                                                                                                                     |     |   |
|------------------------------------------------|-------------------------------------------------------|----------------------------------------|-------------------------------------------------------------------------------------------------------------------------------------|-----|---|
| 12                                             | <u>TGTTTCAAARGACGTACGT</u>                            | BF4334-<br>BF4335                      | HP similar to OMLP (family 1) / HP                                                                                                  | 1-a | - |
| 13                                             | <u>TGTTTCAAAGACGTTTCT</u>                             | BF4531                                 | HP similar to OMLP (family 1)                                                                                                       | 1-a | - |
| 14                                             | <u>TGTTTCAAARACGTACGTC</u><br>T                       | BF4533                                 | OMLP (family 1)                                                                                                                     | 1-a | - |
| <b>Class II IR (AGTTC{N<sub>3</sub>}GAACT)</b> |                                                       |                                        |                                                                                                                                     |     |   |
| 15                                             | <u>ATCGCCAAAGTTCTTCTGGAA</u><br><u>CTT</u>            | BF0388-<br>BF0389                      | Two-component sensor histidine kinase/response regulator hybrid (one-component regulatory system)                                   | 2   | - |
| 16                                             | <u>AAGTYCTATCAGAACTT</u>                              | BF0568-<br>BF0569                      | SusC / SusD                                                                                                                         | 1-d | - |
| 17                                             | IR-<br>1: <u>TGTTCTACTTAAGTTCTTCG</u><br><u>AGAAC</u> | BF0952-<br>BF0953                      | SusC / SusD                                                                                                                         | 4   | - |
|                                                | IR-<br>2: <u>TTCCTAAGTTCCGTATGAAC</u><br><u>TT</u>    | BF0948-<br>BF0947<br>BF0946-<br>BF0945 | SusC / SusD                                                                                                                         |     |   |
|                                                | IR-3:439-bp inverted repeat                           | BF0944-<br>BF0943                      | SusC / SusD                                                                                                                         |     |   |
| 18                                             | <u>AGTTCTCTTAGAACT</u>                                | BF1893<br>BF1894-<br>BF1895            | HP<br>OMP / IMP                                                                                                                     | 1-b | - |
| 19                                             | <u>TCCTAGTTCTTACGGAACTTG</u><br>GAAAA                 | BF2347-<br>BF2353                      | CHP / HP / HP / IMP / HP / HP / HP                                                                                                  | 3   | - |
|                                                |                                                       | BF2354-<br>BF2355<br>BF2356            | HPs belonging same paralog family                                                                                                   |     |   |
| 20                                             | <u>AGTTCTAAAGGAACTA</u>                               | BF3102-<br>BF3105<br>BF3106-<br>BF3107 | IMP<br>Putative chitobiase / SusD / SusC / antisigma factor<br>CHP (N-terminal part of antisigma factor) /<br>ECF-type sigma factor | 1-c | - |
| 21                                             | <u>AGTYCTTTCAGAACT</u>                                | BF3436-<br>BF3437                      | SusD / SusC                                                                                                                         | 1-a | - |

|                                                 |                                      |                                                                                                       |                                                                                                                      |     |   |
|-------------------------------------------------|--------------------------------------|-------------------------------------------------------------------------------------------------------|----------------------------------------------------------------------------------------------------------------------|-----|---|
| 22                                              | <u>AGTTCCTGTAGA</u> ACTT             | BF3784-<br>BF3785                                                                                     | SusD / SusC                                                                                                          | 1-a | - |
| 23                                              | <u>AGTTC</u> AACTGRACTT              | BF4448-<br>BF4449                                                                                     | SusC / SusD                                                                                                          | 1-a | - |
| 24                                              | <u>AGTTC</u> TACGGAACTT              | BF4460                                                                                                | SusC                                                                                                                 | 1-a | - |
| <b>Class III IR (GTTAC{N<sub>7</sub>}GTAAC)</b> |                                      |                                                                                                       |                                                                                                                      |     |   |
| 25                                              | <u>GTTACTTTGTAGGTAAC</u> GGCA        | BF3000-<br>BF2992                                                                                     | HP / OMP (family 1) / CHP / OMLP / CHP /<br>OMP / OMP / OMP / OMP                                                    | 1-a | + |
| 26                                              | <u>CCGTTACTTCGTAGGTAAC</u> GG<br>GA  | BF4031-<br>BF4023                                                                                     | OMLP / IMP / OMP (family 1) / OMP / OMP<br>/ IMP / IMP / OMP / HP                                                    | 1-a | + |
| 27                                              | <u>GTTACTTTGTAGGTAAC</u>             | BF4281-<br>BF4279                                                                                     | OMLP / OMP / OMLP                                                                                                    | 1-a | + |
| <b>Class IV IR (TACTTANTAGGTAANAGAA)</b>        |                                      |                                                                                                       |                                                                                                                      |     |   |
| 28                                              | <u>TCCCTTACTTATTAGGTAATAG</u><br>ACA | BF2767-<br>BF2769                                                                                     | Glycosyltransferase / polysaccharide export<br>OMP /                                                                 | 1-a | + |
| 29                                              | <u>TACTTAATAGGTAAGAGAA</u>           | BF3395-<br>BF3396<br>BF3397                                                                           | tyrosine-protein kinase<br>10-kD chaperonine, GroES / 60-kD<br>chaperonine, GroEL<br>HP                              | 1-b | - |
| <b>Class V IR (TCTGCAAAGNCTTTGCAGA)</b>         |                                      |                                                                                                       |                                                                                                                      |     |   |
| 30                                              | <u>TCTGCAAAGACTTTGCAGA</u>           | BF0665-<br>BF0666<br>BF0668-<br>BF0669<br>BF0670-<br>BF0671                                           | OMP / SusC<br>SusC / SusD<br>SusC / SusD                                                                             | 4   | + |
| <b>Class VI IR (ACTAAGTTCTATCGG)</b>            |                                      |                                                                                                       |                                                                                                                      |     |   |
| 31                                              | <u>ACTAAGTTCTATCGG</u>               | BF1710-<br>BF1712<br>BF1713-<br>BF1714<br>BF1715-<br>BF1717<br>BF1718-<br>BF1720<br>BF1722-<br>BF1723 | SusC / SusD / HP<br>SusC / SusD<br>CHP / HP / putative ATPase<br>SusC / SusD / $\alpha$ -L-fucosidase<br>SusC / SusD | 4   | - |

BF1724-  
BF1725

SusC / SusD

---

\*Consensus motif sequences are underlined.

†Promoter orientations of each region in the final sequence assembly are indicated by red (on orientation) and blue (off orientation) letters.

‡Gene products related to the synthesis of surface structures are indicated by green letters. IMP, putative inner membrane protein; OMP, putative outer membrane protein; OMLP, putative outer membrane lipoprotein; CHP, conserved hypothetical protein; HP, hypothetical protein.

§Functional classification of DNA inversions is shown in Fig. 2.

¶Plus or minus indicates whether a site-specific recombinase gene is colocalized or not.
