# Supplementary material
Source: PubMed Central journal article supplement (PMC522005)
Supplement: pnas_101_41_14919__14.pdf [file pnas_101_41_14919__14.pdf]

**Table 7. Putatively invertible regions on the BT strain VPI-5482 genome**

| Region                                          | IR sequence *                           | Affected genes †  | Description ‡                                                             | Inversion type § | Recombinase ¶ |
|-------------------------------------------------|-----------------------------------------|-------------------|---------------------------------------------------------------------------|------------------|---------------|
| <b>Class II IR (AGTTC{N<sub>5</sub>}GAACT)</b>  |                                         |                   |                                                                           |                  |               |
| 1                                               | IR-1:74-bp repeat<br>IR-2:286-bp repeat | BT3239-<br>BT3235 | SusC / HP (family 1) / OMLP (family 1) / OMP (family 1) / OMLP (family 2) | 1-b              | -             |
|                                                 |                                         | BT3240-<br>BT3244 | SusC / HP (family 1) / OMLP (family 1) / OMP (family 1) / OMLP (family 2) |                  |               |
| 2                                               | <u>AGTTCTGTAGAACT</u>                   | BT4040-<br>BT4038 | Putative galactose oxidase / SusC / SusD                                  | 1-a              | -             |
| 3                                               | <u>AGTTCTGTTAGAACT</u>                  | BT4248-<br>BT4244 | Putative antisigma factor / SusC / SusD / IMP / OMP                       | 1-c              | -             |
|                                                 |                                         | BT4249-<br>BT4250 | HP (N-terminal part of antisigma factor) / ECF-type sigma factor          |                  |               |
| 4                                               |                                         | BT4440-<br>BT4441 | Putative cell surface proteins                                            | 2                | -             |
|                                                 | ATACTAAGTTCAAAGAGAACTTG<br>GAAATTACA    |                   |                                                                           |                  |               |
| 5                                               | <u>AGTTCATGGAGAACTTGGT</u>              | BT0867-<br>BT0865 | SusC / SusD / putative chitinase                                          | 1-a              | -             |
| <b>Class III IR (GTTAC{N<sub>7</sub>}GTAAC)</b> |                                         |                   |                                                                           |                  |               |
| 6                                               | <u>GTTACTTCTTAGGTAACGGAAGT</u>          | BT0376-<br>BT0400 | UpxYZ-PS-1                                                                | 1-a              | +             |
| 7                                               | <u>GTTACTTCTTAGGTAACGGA</u>             | BT0596-<br>BT0614 | UpxYZ-PS-3                                                                | 1-a              | +             |
| 8                                               | <u>CGTACTTCTTAGGTAACG</u>               | BT1656-<br>BT1642 | UpxYZ-PS-5                                                                | 1-a              | +             |
| 9                                               | <u>CGTACTTCTTAGGTAACG</u>               | BT1725-<br>BT1707 | UpxYZ-PS-6                                                                | 1-a              | +             |
| 10                                              | <u>GTTACTTCTTAGGTAACGG</u>              | BT4480-<br>BT4481 | HP / OMP (OmpA family)                                                    | 1-a              | +             |
| 11                                              | <u>TGTTACTTCTTAGGTAACGAAA</u>           | BT0292-<br>BT0294 | OMP / HP / HP                                                             | 1-a              | +             |
| 12                                              | <u>GTTACTTCATAGGTAACGG</u>              | BT1502-           | OMP (family 2) / OMP (OmpA)                                               | 1-a              | +             |

|                                          |                               |                                                             |                                                               |     |   |
|------------------------------------------|-------------------------------|-------------------------------------------------------------|---------------------------------------------------------------|-----|---|
| 13                                       | <u>GTTACTTTGTAGGTAACGG</u>    | BT1501<br>BT1507-<br>BT1505                                 | family)<br>OMP (family 2) / IMP / OMP (OmpA<br>family)        | 1-a | + |
| 14                                       | <u>GTTACTCTGTAGGTAACGG</u>    | BT1512-<br>BT1511                                           | OMP / putative cell surface protein                           | 1-a | + |
| 15                                       | <u>GTTACTTTGTAGGTAACGGGAA</u> | BT1792-<br>BT1791                                           | Putative cell surface protein / OMP                           | 1-a | + |
| 16                                       | <u>GTTACTTGGTAGGTAACGGG</u>   | BT1826                                                      | IMP                                                           | 1-a | + |
| 17                                       | <u>GTTACTTTGTAGGTAACGGGAA</u> | BT1927                                                      | HP                                                            | 1-a | + |
| 18                                       | <u>GTTACTTCTTAGGTAACGG</u>    | BT2444                                                      | IMP                                                           | 1-a | + |
| 19                                       | <u>GTTACTTTGTAGGTAACGGG</u>   | BT2486-<br>BT2485                                           | IMP / OMP (OmpA family)                                       | 1-a | + |
| <b>Class IV IR (TCTGCAAAGNCTTTGCAGA)</b> |                               |                                                             |                                                               |     |   |
| 20                                       | <u>TCTGCAAAGACTTTGCARA</u>    | BT2260-<br>BT2259<br>BT2264-<br>BT2261<br>BT2268-<br>BT2269 | SusC / IMP<br><br>SusC / OMLP / OMLP / OMP<br><br>SusC / SusD | 4   | + |

\*Consensus motif sequences are underlined.

<sup>†</sup>Promoter orientations of each region in the final sequence assembly are indicated by red (on orientation) and blue (off-orientation) letters.

<sup>‡</sup>Gene products related to the synthesis of surface structures are indicated by green letters. IMP, putative inner membrane protein; OMP, putative outer membrane protein; OMLP, putative outer membrane lipoprotein; HP, hypothetical protein.

<sup>§</sup>Functional classification of DNA inversions is shown in Fig. 2.

<sup>¶</sup>Plus or minus indicates whether a site-specific recombinase gene is colocalized or not.

<sup>||</sup>IR-1 and IR-2 both located in the N-terminal parts of BT3239 and BT3240. The DNA inversions via these IRs exchange the N-terminal coding sequences of the two ORFs. However, because the N-terminal coding sequences of the two ORFs are highly conserved, the DNA inversions via IR-1 and IR-2 result in only three and no amino acids exchanges, respectively. Thus, the

DNA inversion in this region is categorized as type 1-b.
