# Supplementary material
Source: PubMed Central journal article supplement (PMC522005)

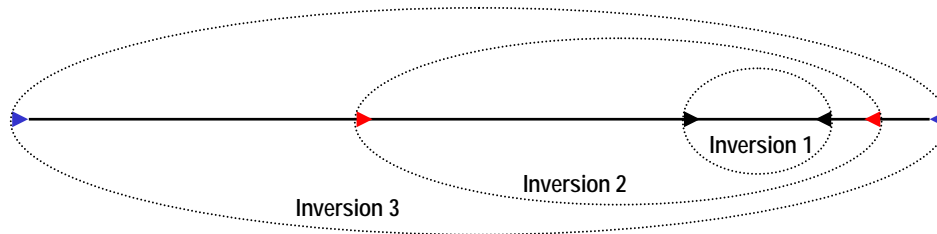

No Inversion

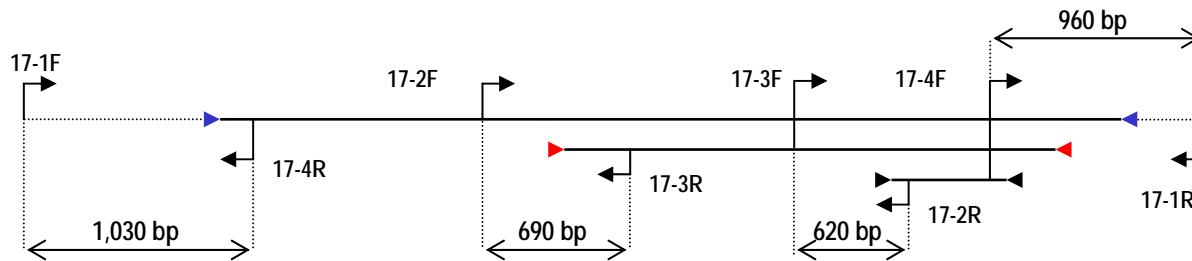

Inversion 1

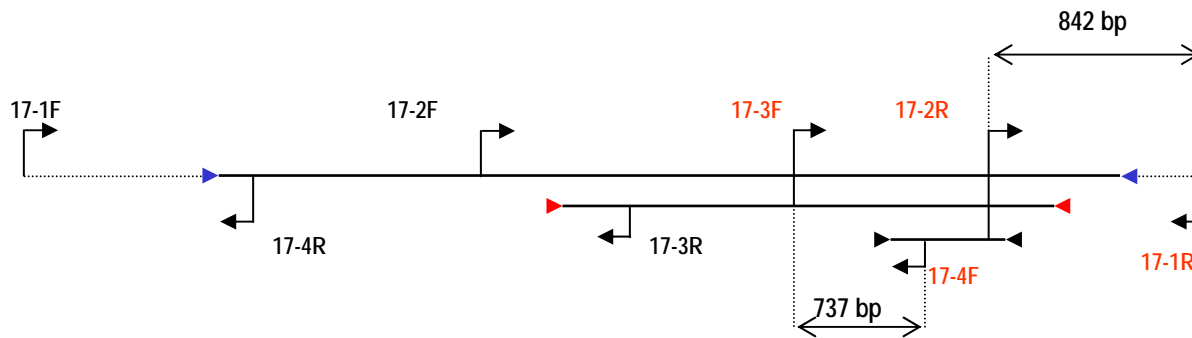

Inversion 2

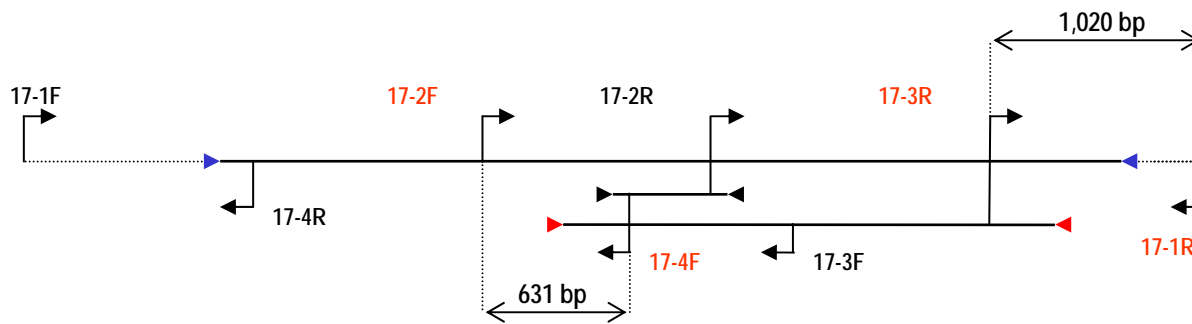

Inversion 3

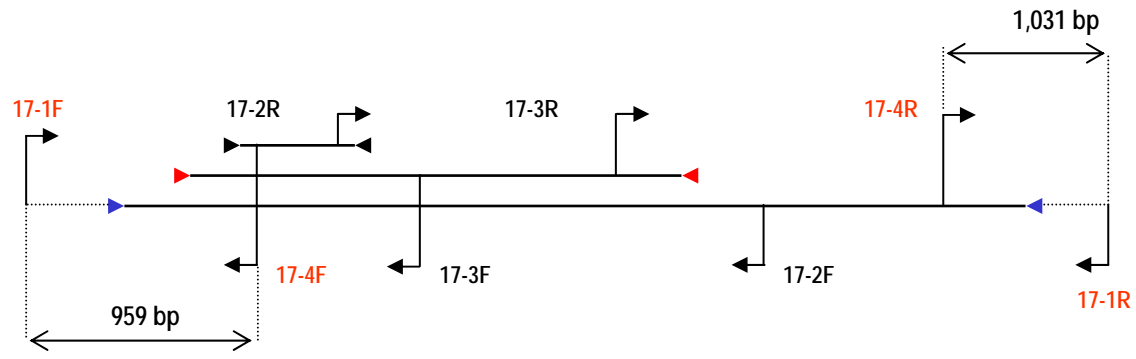

Inversion 1+2

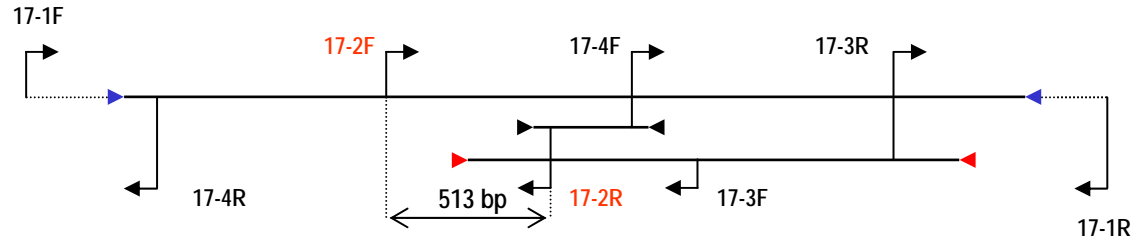

Inversion 2+3

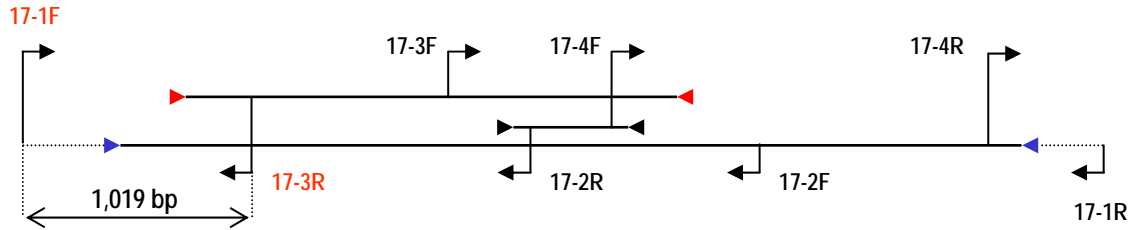

Inversion 1+3

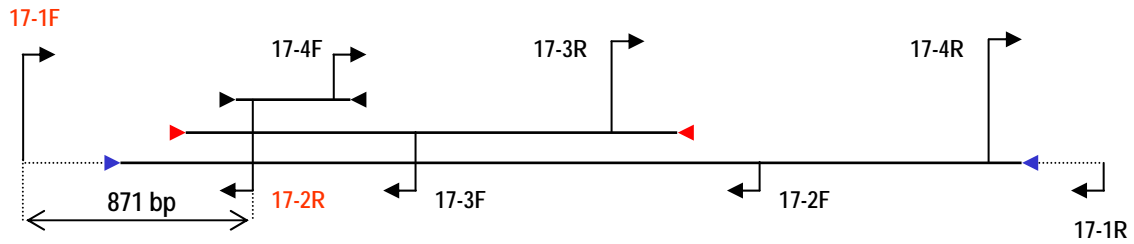

Supplement: pnas_101_41_14919__1.pdf [file pnas_101_41_14919__1.pdf]

**A**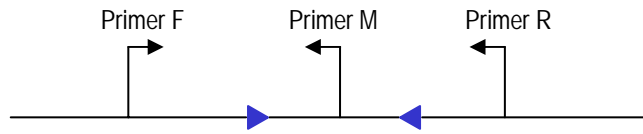

PCR protocol F: primer F + primer M

PCR protocol R: primer M + primer R

**B**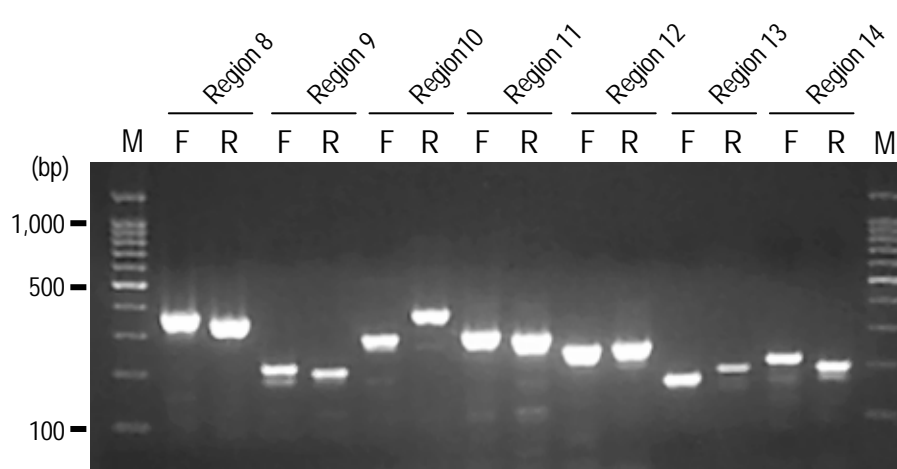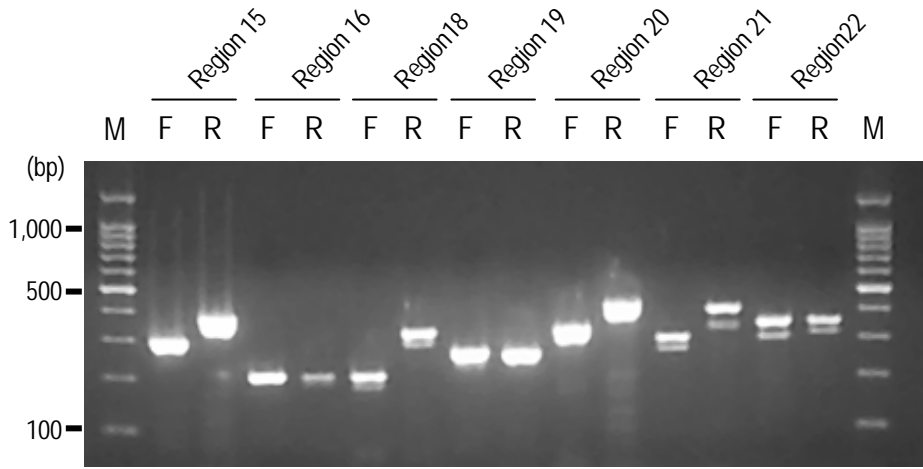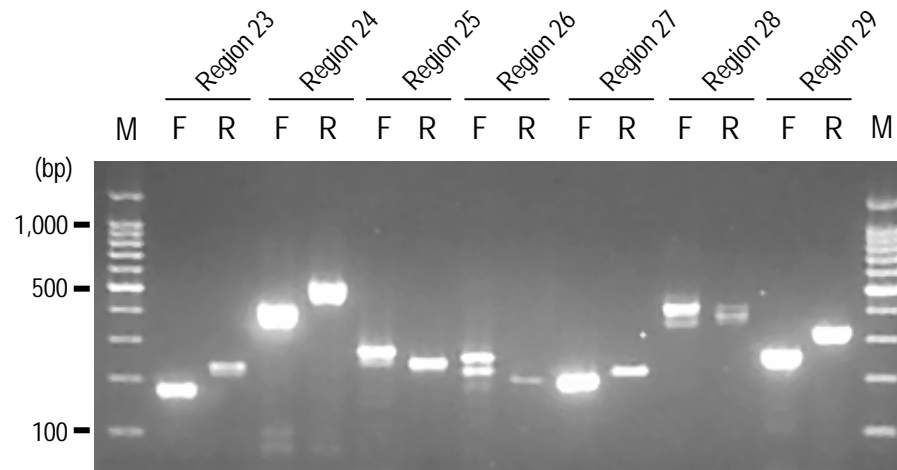

Supplement: pnas_101_41_14919__11.pdf [file pnas_101_41_14919__11.pdf]

**A**

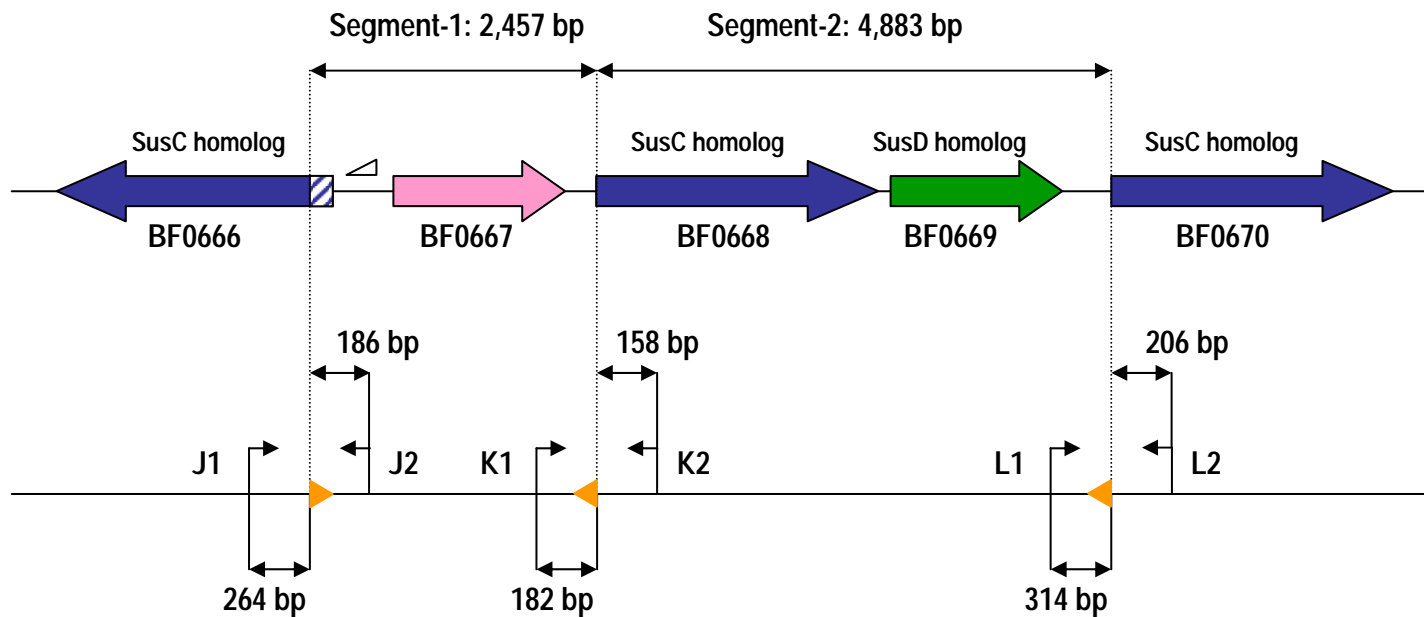

**B**

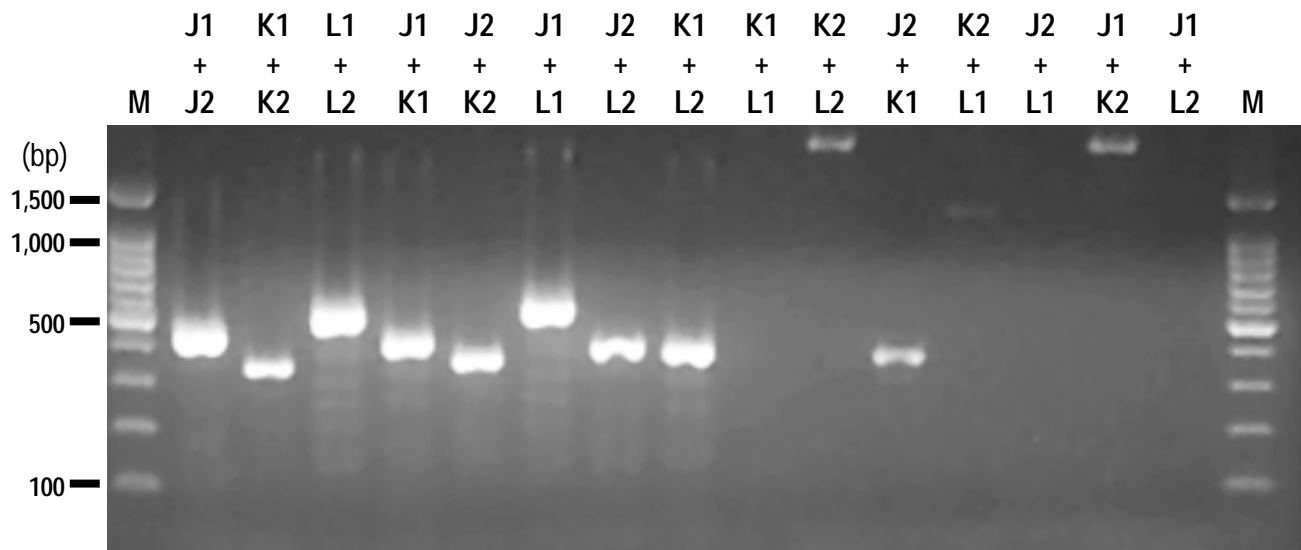

Supplement: pnas_101_41_14919__12.pdf [file pnas_101_41_14919__12.pdf]

**A**

▶ 15-bp inverted repeat sequences: ACTAAGTTCTATCGG

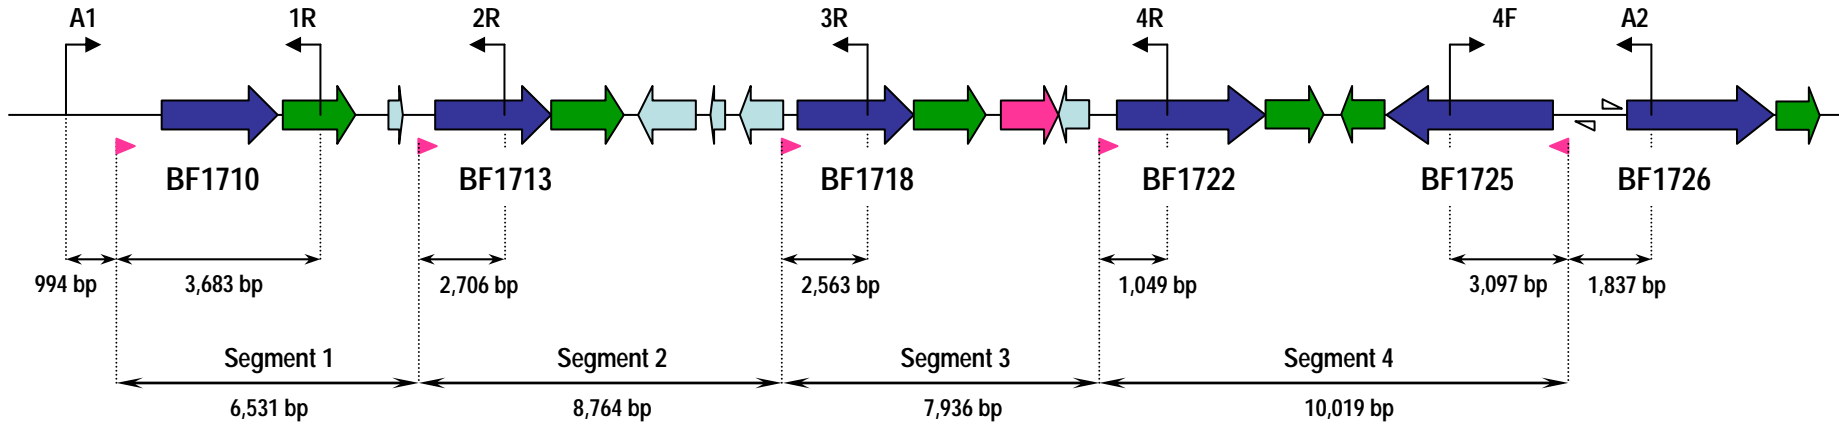**B**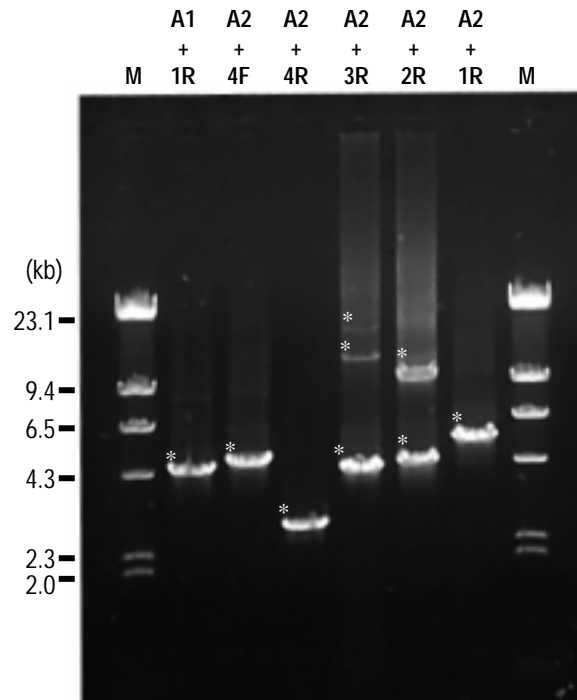

Supplement: pnas_101_41_14919__13.pdf [file pnas_101_41_14919__13.pdf]

### Non-duplicated

### Duplicated

No. of genes

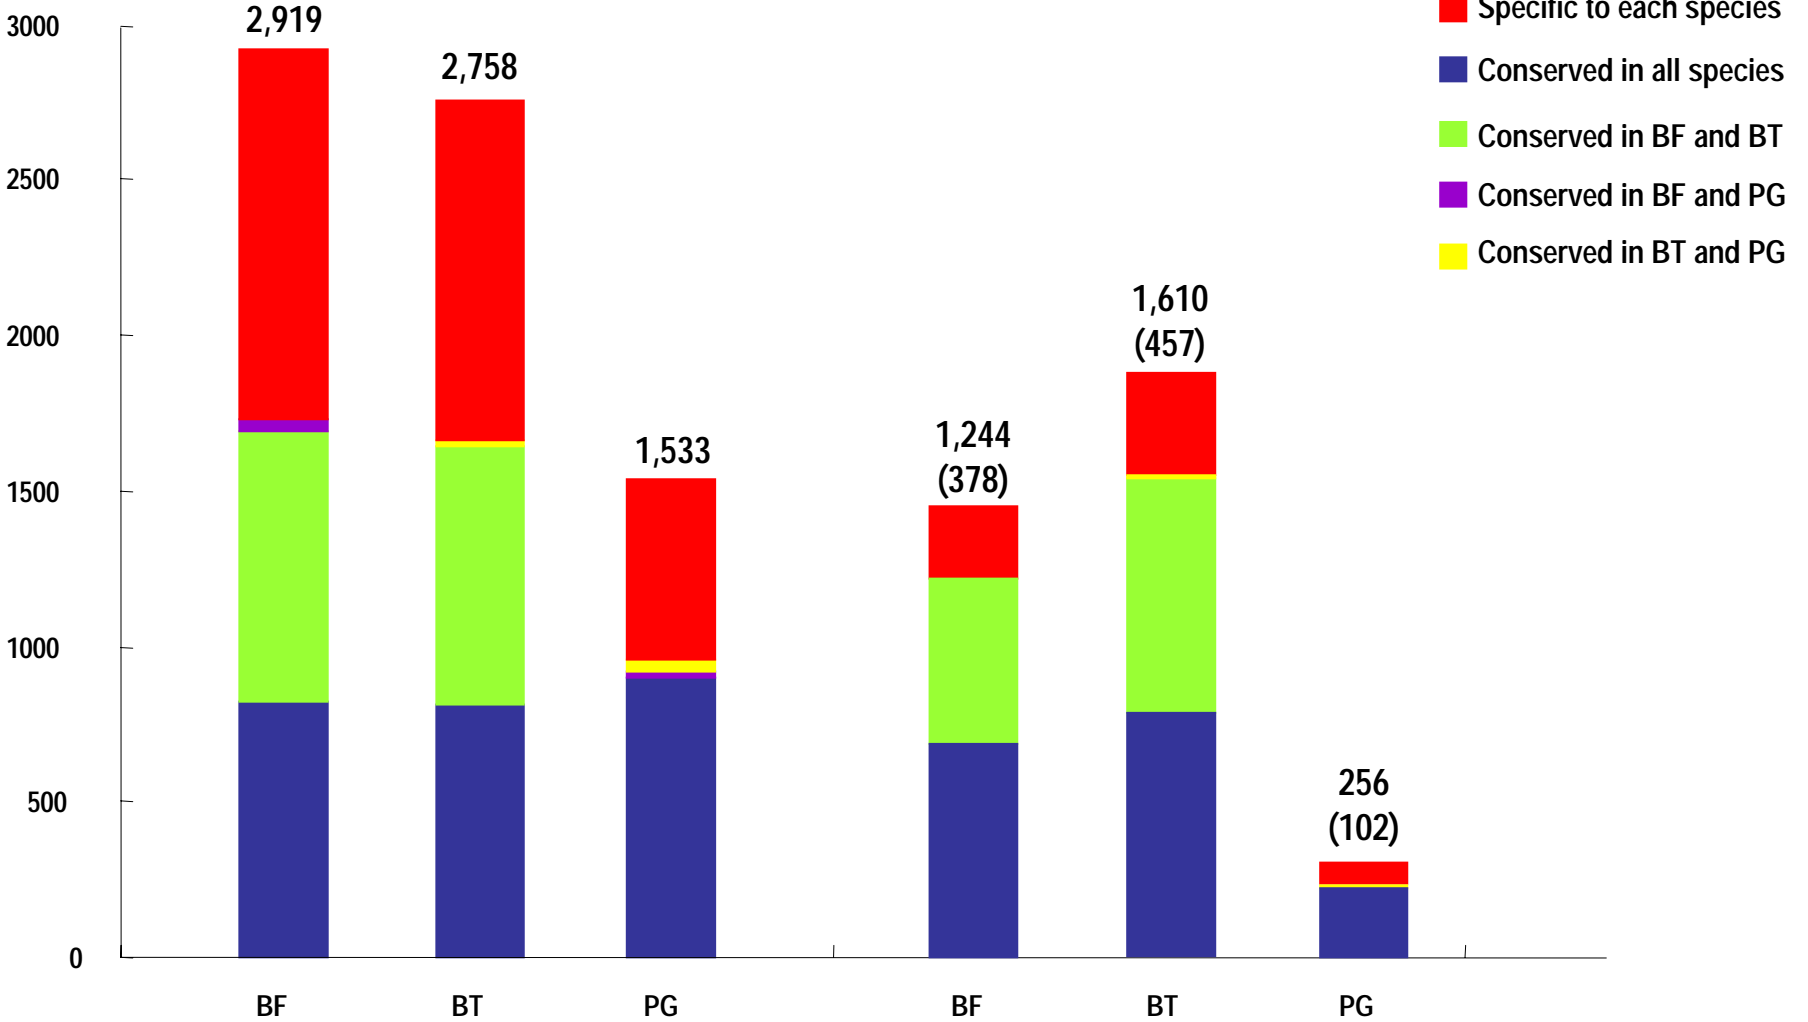

Supplement: pnas_101_41_14919__5.pdf [file pnas_101_41_14919__5.pdf]

No. of genes

Non-duplicated

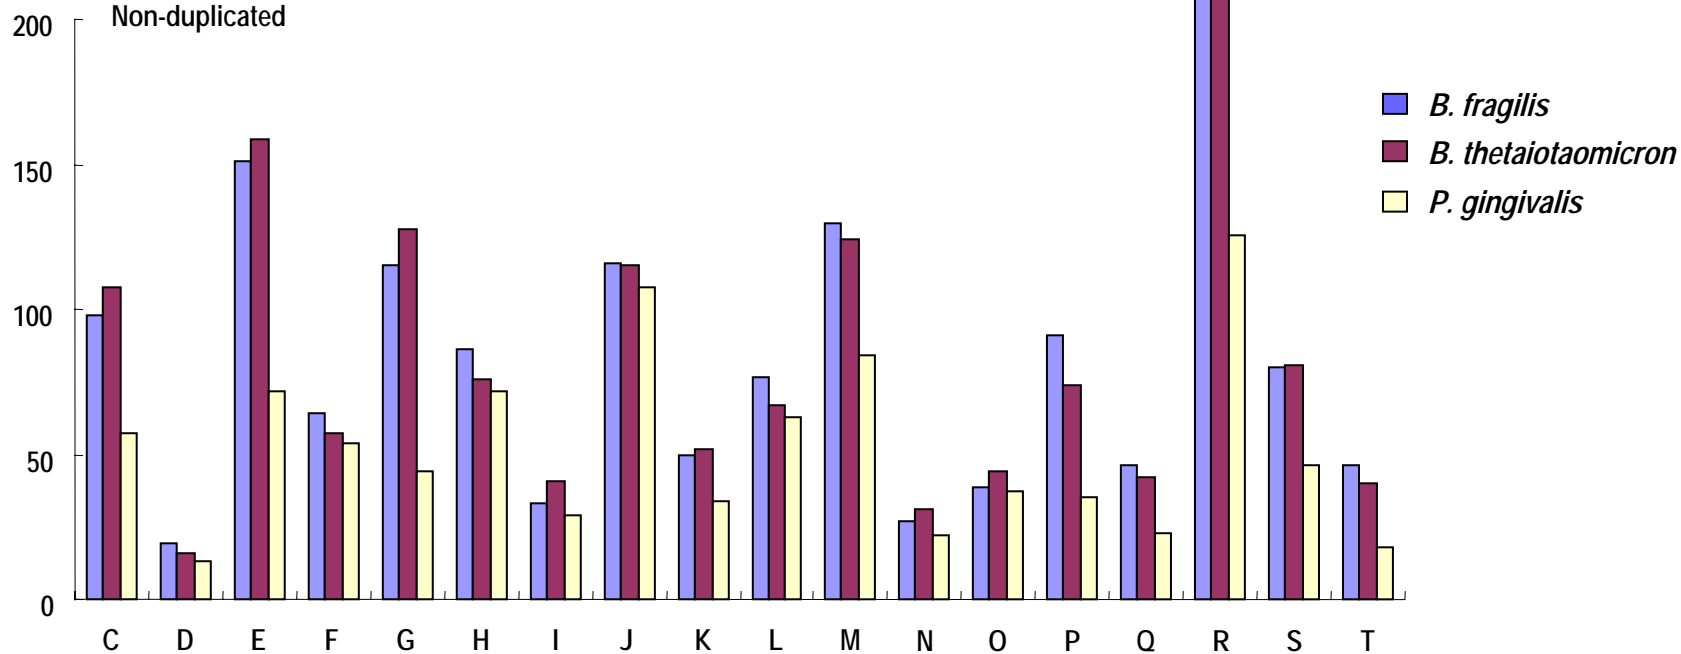

0

0

50

100

150

Duplicated

No. of genes

0

50

100

150

C

D

E

F

G

H

I

J

K

L

M

N

O

P

Q

R

S

T

Supplement: pnas_101_41_14919__6.pdf [file pnas_101_41_14919__6.pdf]
